# Supplementary material
Source: PubMed Central journal article supplement (PMC129743)

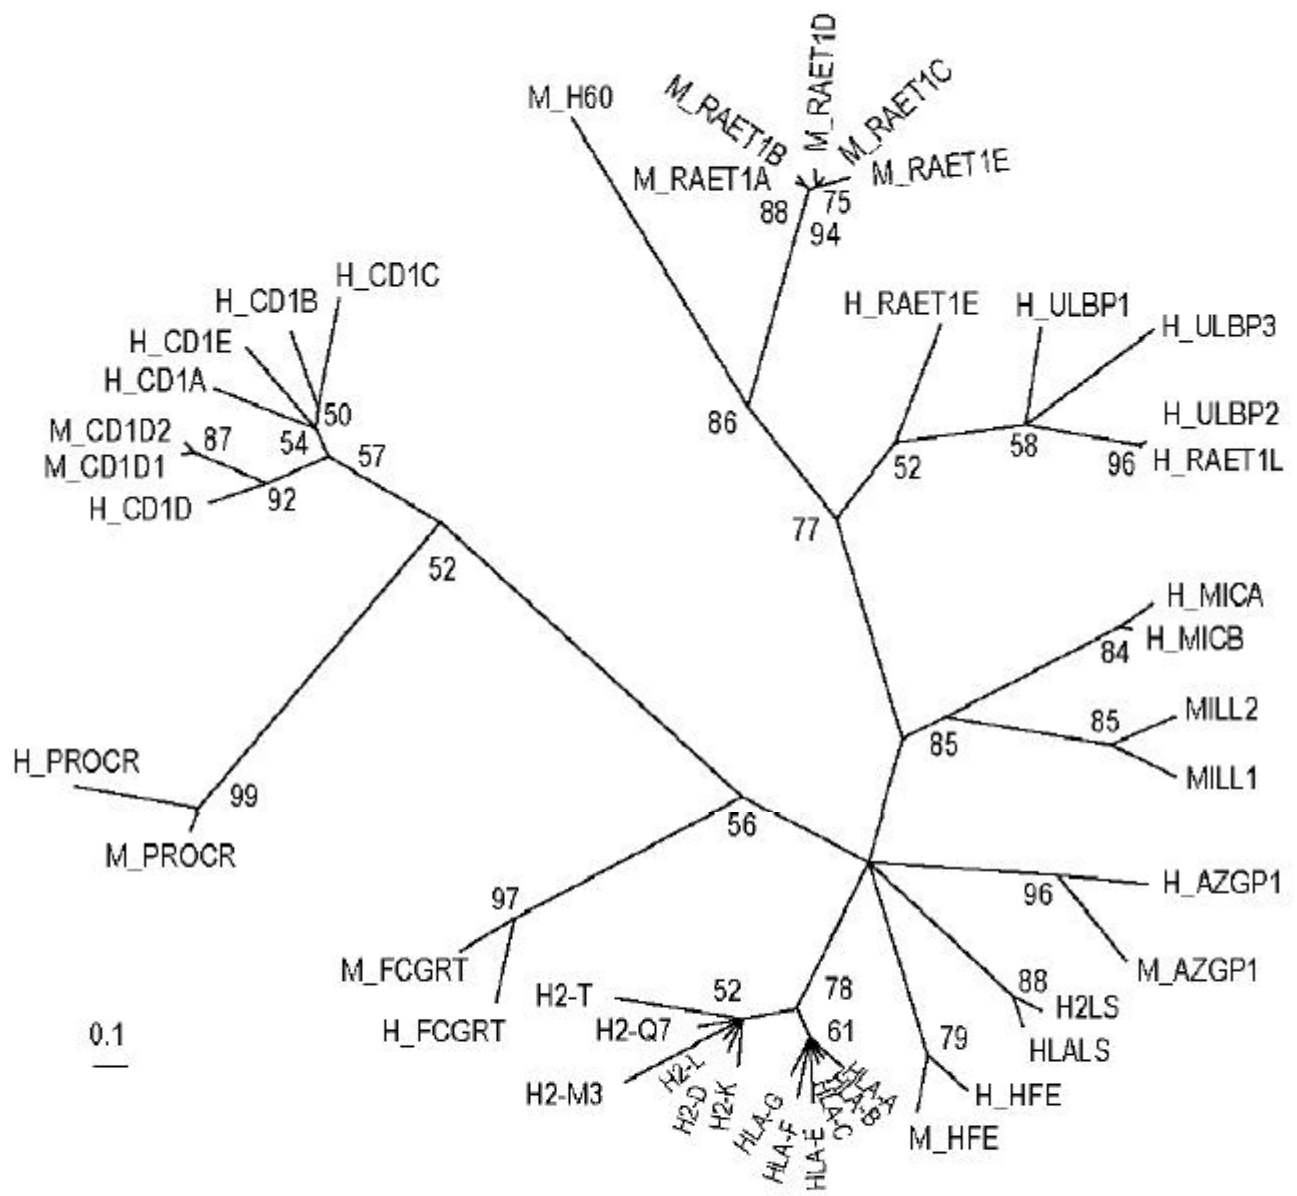

Supplement: pnas_212375299_2.pdf [file pnas_212375299_2.pdf]
